# Supplementary material
Source: PubMed Central journal article supplement (PMC3308765)
Supplement: supp_M111.313940_jbc.M111.313940-1.pdf [file supp_M111.313940_jbc.M111.313940-1.pdf]

**SUPPLEMENTAL TABLE 1. Unique HLA-DQ2trans and HLA-DQ8trans eluted peptides and their predicted 9 amino acid core with anchor residues.** Peptides eluted from HLA-DQ2trans or HLA-DQ8trans. After peptide elution, MS/MS analysis and identification unique peptides derived from different proteins were selected and predictions for their anchor residues were conducted based on molecular simulation studies. Anchor residues p1, p4, p6, p7 and p9 are shown in bold.

| <b>HLA-DQ2trans</b>                                                              |                                                                                               |                                                                                     |
|----------------------------------------------------------------------------------|-----------------------------------------------------------------------------------------------|-------------------------------------------------------------------------------------|
| IP <b>EH</b> DEADEISDEN                                                          | E <b>DE</b> EKDE <b>EE</b> DEDEDK                                                             | IFEIERGVSADDEA                                                                      |
| DEDE <b>EE</b> EGEEVVEDR                                                         | KE <b>GE</b> EADAPGVIPG                                                                       | GVLDE <b>QE</b> LEALF <b>T</b> KE                                                   |
| KVDENMVID <b>E</b> TLDVK                                                         | KPSAGDD <b>FD</b> LGDAVVDG                                                                    | DTGEGWETVEMHPA                                                                      |
| VGEQD <b>G</b> GLIGAEKVIN                                                        | GLDLADALDDQDDGR                                                                               | DTNQDRLV <b>T</b> LEEF <b>L</b> A                                                   |
| DLQ <b>P</b> WHSFGADSV <b>P</b> AN                                               | PPG <b>S</b> GLDLADALDDQDDG                                                                   | FHPD <b>T</b> DDV <b>P</b> VPAPAG                                                   |
| DG <b>S</b> EDK <b>V</b> VEVA <b>EE</b> EEVA                                     | SV <b>K</b> ESA <b>E</b> VE <b>EE</b> IVFPR                                                   | NEEDDM <b>V</b> ME <b>E</b> ER                                                      |
| G <b>S</b> EDK <b>V</b> VEVA <b>EE</b> EE                                        | EAC <b>S</b> PS <b>S</b> GG <b>E</b> GASEG <b>K</b> QER                                       | DSLQD <b>I</b> GM <b>D</b> HQ <b>AL</b> L <b>K</b> Q                                |
| MP <b>S</b> LT <b>E</b> T <b>K</b> TT <b>V</b> ELLPVN                            | G <b>I</b> L <b>N</b> PS <b>Q</b> PG <b>Q</b> SSSS <b>S</b> QT                                | DVNSD <b>G</b> FL <b>D</b> E <b>QE</b> LEAL                                         |
| VPANT <b>E</b> NEVE <b>P</b> DAR <b>P</b> A                                      | AG <b>P</b> E <b>A</b> LE <b>A</b> EE <b>V</b> SG                                             | EPDSW <b>E</b> TLD <b>Q</b> Q <b>F</b>                                              |
| G <b>P</b> T <b>G</b> EP <b>Q</b> Q <b>E</b> DE <b>F</b> LMATD                   | GP <b>M</b> DAS <b>V</b> EE <b>E</b> GVRR                                                     | LD <b>Q</b> Q <b>Q</b> FF <b>T</b> EEEL <b>K</b> E                                  |
| NP <b>V</b> ED <b>S</b> Q <b>V</b> IVE <b>V</b> SI                               | SE <b>D</b> MD <b>H</b> GV <b>L</b> VV <b>G</b> Y <b>G</b> FE                                 | LE <b>P</b> DSW <b>E</b> TLD <b>Q</b> Q                                             |
| P <b>V</b> ED <b>S</b> Q <b>V</b> IVE <b>V</b> S <b>I</b> FP                     | E <b>I</b> HDA <b>A</b> D <b>T</b> I <b>E</b> DTAT                                            | AN <b>E</b> VE <b>A</b> V <b>K</b> VS <b>F</b> PT                                   |
| EP <b>H</b> TE <b>P</b> EE <b>Q</b> VP <b>V</b> E <b>A</b> EPQN                  | AV <b>G</b> GL <b>G</b> K <b>L</b> G <b>K</b> DA                                              | LE <b>D</b> LE <b>E</b> A <b>E</b> EP <b>D</b> ME <b>E</b> DD                       |
| V <b>Y</b> EE <b>Q</b> AV <b>Y</b> E <b>P</b> LE <b>N</b> EG                     | GA <b>V</b> HD <b>V</b> K <b>D</b> V <b>L</b> DS                                              | ME <b>E</b> DD <b>D</b> Q <b>K</b> AV <b>K</b> DEL                                  |
| VS <b>N</b> D <b>K</b> AL <b>M</b> VL <b>T</b> EE <b>P</b> L                     | SS <b>L</b> LE <b>K</b> GL <b>D</b> G <b>A</b> K                                              | A <b>A</b> D <b>H</b> D <b>V</b> GS <b>E</b> LP <b>E</b> GV <b>L</b>                |
| G <b>A</b> DD <b>A</b> AD <b>A</b> D <b>T</b> A <b>I</b> IN                      | V <b>N</b> E <b>R</b> T <b>L</b> E <b>V</b> E <b>I</b> EP <b>G</b> VR                         | GP <b>D</b> ED <b>S</b> SN <b>R</b> EN <b>A</b> IE <b>D</b> E                       |
| D <b>E</b> EV <b>D</b> EM <b>I</b> RE <b>A</b> D <b>I</b> D <b>G</b> D           | AD <b>G</b> Y <b>S</b> AD <b>L</b> PL <b>P</b> PIR                                            | D <b>I</b> DL <b>S</b> D <b>V</b> EL <b>D</b> DL <b>G</b> K                         |
| E <b>DE</b> EKDE <b>EE</b> DEDEDK                                                | N <b>V</b> IE <b>G</b> P <b>V</b> FR <b>P</b> GS <b>K</b> T                                   | ED <b>I</b> DL <b>S</b> D <b>V</b> EL <b>D</b> DL <b>G</b>                          |
| KE <b>GE</b> EADAPGVIPG                                                          | V <b>V</b> T <b>G</b> N <b>M</b> GS <b>N</b> D <b>K</b> VG <b>D</b> F                         | GR <b>D</b> GE <b>L</b> P <b>V</b> ED <b>D</b> IDL <b>S</b> D                       |
| KPSAGDD <b>FD</b> LGDAVVDG                                                       | K <b>V</b> LE <b>G</b> M <b>V</b> E <b>N</b> Q <b>V</b> N <b>V</b> E                          | LP <b>V</b> ED <b>D</b> IDL <b>S</b> D <b>V</b> EL <b>D</b> DL <b>G</b>             |
| GLDLADALDDQDDGR                                                                  | G <b>D</b> LD <b>V</b> GG <b>L</b> Q <b>E</b> TD <b>K</b> IE                                  | EE <b>G</b> E <b>A</b> GE <b>E</b> EL <b>P</b> PP <b>G</b>                          |
| KPPG <b>S</b> GLDLADALDDQDDG                                                     | DK <b>I</b> IE <b>V</b> EE <b>E</b> Q <b>E</b> DP <b>Y</b>                                    | VE <b>K</b> Q <b>E</b> EE <b>E</b> EE <b>L</b> LP <b>V</b>                          |
| SV <b>K</b> ESA <b>E</b> VE <b>EE</b> IVFPR                                      | L <b>Q</b> ET <b>D</b> K <b>I</b> IE <b>V</b> EE <b>E</b> Q <b>E</b> DP <b>Y</b>              | A <b>Q</b> QE <b>Q</b> E <b>L</b> A <b>A</b> D <b>A</b> F <b>K</b> EL               |
| EAC <b>S</b> PS <b>S</b> GG <b>E</b> GASEG <b>K</b> QER                          | L <b>S</b> LD <b>T</b> EV <b>D</b> E <b>N</b> ALS <b>P</b> E                                  | DE <b>A</b> IE <b>T</b> DD <b>L</b> T <b>I</b> K                                    |
| G <b>I</b> L <b>N</b> PS <b>Q</b> PG <b>Q</b> SSSS <b>S</b> QT                   | VP <b>W</b> PH <b>V</b> EG <b>V</b> EV <b>D</b> LES <b>I</b> R                                | RP <b>D</b> SEL <b>G</b> ER <b>P</b> PP <b>D</b> N <b>Q</b> S                       |
| AG <b>P</b> E <b>A</b> LE <b>A</b> EE <b>V</b> SG                                | E <b>F</b> EE <b>A</b> E <b>Q</b> V <b>R</b> E <b>N</b> LP <b>D</b> E                         | D <b>G</b> D <b>G</b> F <b>V</b> T <b>T</b> EEL <b>K</b>                            |
| GP <b>M</b> DAS <b>V</b> EE <b>E</b> GVRR                                        | DP <b>E</b> SE <b>A</b> D <b>R</b> A <b>A</b> VED <b>I</b> NP <b>A</b>                        | N <b>Q</b> S <b>F</b> Q <b>D</b> HE <b>A</b> FL <b>G</b> KE                         |
| SE <b>D</b> MD <b>H</b> GV <b>L</b> VV <b>G</b> Y <b>G</b> FE                    | GP <b>E</b> RD <b>Q</b> L <b>V</b> IP <b>D</b> G <b>Q</b> EE                                  | ER <b>P</b> PP <b>D</b> N <b>Q</b> S <b>F</b> Q <b>D</b> HE <b>A</b> FL <b>G</b> KE |
| E <b>I</b> HDA <b>A</b> D <b>T</b> I <b>E</b> DTAT                               | VS <b>Q</b> EN <b>P</b> EM <b>E</b> GP <b>E</b> RD <b>Q</b>                                   | F <b>V</b> D <b>Q</b> DE <b>Y</b> I <b>A</b> DM <b>F</b> S <b>H</b> E               |
| AV <b>G</b> GL <b>G</b> K <b>L</b> G <b>K</b> DA                                 | D <b>W</b> A <b>Q</b> E <b>Q</b> D <b>A</b> PA <b>I</b> L <b>F</b> DK                         | Y <b>I</b> ADM <b>F</b> S <b>H</b> E <b>E</b> NG <b>P</b> EP <b>D</b>               |
| GA <b>V</b> HD <b>V</b> K <b>D</b> V <b>L</b> DS                                 | F <b>D</b> E <b>D</b> EM <b>F</b> Y <b>V</b> LD <b>D</b> K <b>K</b> ET                        | SD <b>Y</b> D <b>R</b> E <b>A</b> L <b>L</b> GV <b>Q</b> ED <b>V</b> EV <b>K</b>    |
| SS <b>L</b> LE <b>K</b> GL <b>D</b> G <b>A</b> K                                 | ED <b>I</b> V <b>A</b> D <b>H</b> V <b>A</b> S <b>Y</b> GV <b>N</b> L                         | R <b>Q</b> L <b>H</b> DD <b>Y</b> F <b>Y</b> H <b>D</b> EL                          |
| V <b>N</b> E <b>R</b> T <b>L</b> E <b>V</b> E <b>I</b> EP <b>G</b> VR            | Y <b>G</b> V <b>N</b> LY <b>Q</b> S <b>Y</b> GS <b>P</b> SG <b>Q</b> YS <b>H</b> E <b>F</b> D | IA <b>Q</b> EE <b>A</b> L <b>H</b> L <b>I</b> D <b>E</b> MD                         |
| AD <b>G</b> Y <b>S</b> AD <b>L</b> PL <b>P</b> PIR                               | F <b>D</b> GE <b>E</b> F <b>Y</b> VD <b>L</b> ER                                              | D <b>I</b> NT <b>D</b> GA <b>V</b> N <b>F</b> Q <b>E</b> F                          |
| N <b>V</b> IE <b>G</b> P <b>V</b> FR <b>P</b> GS <b>K</b> T                      | D <b>V</b> GE <b>F</b> RA <b>V</b> T <b>L</b> L <b>G</b> LP <b>A</b>                          | EG <b>P</b> KE <b>G</b> E <b>A</b> V <b>V</b> L <b>P</b> EV <b>E</b> P <b>L</b> T   |
| V <b>V</b> T <b>G</b> N <b>M</b> GS <b>N</b> D <b>K</b> VG <b>D</b> F            | TA <b>V</b> DT <b>A</b> A <b>Q</b> IS <b>E</b> Q <b>K</b> SN                                  | DD <b>L</b> ED <b>S</b> M <b>I</b> G <b>P</b> EV <b>V</b> H <b>P</b> L              |
| K <b>V</b> LE <b>G</b> M <b>V</b> E <b>N</b> Q <b>V</b> N <b>V</b> E             | G <b>S</b> GS <b>G</b> W <b>S</b> SS <b>R</b> GP <b>Y</b>                                     | DS <b>N</b> HD <b>G</b> IV <b>T</b> A <b>E</b> E <b>L</b> ES <b>Y</b>               |
| G <b>D</b> LD <b>V</b> GG <b>L</b> Q <b>E</b> TD <b>K</b> IE                     | DE <b>E</b> MD <b>V</b> GT <b>D</b> EE <b>E</b> ET <b>A</b> K                                 | SE <b>L</b> ESS <b>I</b> Q <b>E</b> ED <b>S</b> L <b>K</b>                          |
| K <b>I</b> IE <b>V</b> EE <b>E</b> Q <b>E</b> DP <b>Y</b>                        | DE <b>A</b> AVE <b>EE</b> EE <b>K</b> K <b>P</b>                                              | E <b>E</b> LD <b>A</b> EV <b>L</b> EV <b>F</b> H <b>P</b> T                         |
| L <b>Q</b> ET <b>D</b> K <b>I</b> IE <b>V</b> EE <b>E</b> Q <b>E</b> DP <b>Y</b> | ID <b>P</b> DA <b>K</b> VE <b>EE</b> PE <b>E</b> PE                                           | L <b>N</b> L <b>Q</b> T <b>G</b> ER <b>E</b> AK <b>L</b> Q <b>Y</b> E               |
| L <b>S</b> LD <b>T</b> EV <b>D</b> E <b>N</b> ALS <b>P</b> E                     | VD <b>V</b> D <b>G</b> T <b>V</b> E <b>E</b> D <b>L</b> G <b>K</b> S                          | S <b>Q</b> LE <b>E</b> AG <b>R</b> A <b>E</b> ML <b>D</b> HA                        |
| VP <b>W</b> PH <b>V</b> EG <b>V</b> EV <b>D</b> LES <b>I</b> R                   | V <b>Q</b> RE <b>E</b> E <b>A</b> I <b>Q</b> L <b>D</b> GL <b>N</b>                           | V <b>S</b> RDL <b>G</b> L <b>A</b> AD <b>L</b> PG <b>G</b> A                        |
| E <b>F</b> EE <b>A</b> E <b>Q</b> V <b>R</b> E <b>N</b> LP <b>D</b> E            | TP <b>A</b> NE <b>D</b> Q <b>K</b> I <b>G</b> I <b>E</b> I <b>K</b>                           | V <b>V</b> VE <b>G</b> Q <b>D</b> RE <b>V</b> PE <b>N</b> K <b>P</b> P              |
| IP <b>EH</b> DEADEISDEN                                                          | AE <b>A</b> GP <b>E</b> GV <b>A</b> PA <b>P</b> E <b>G</b> E <b>K</b>                         | AL <b>P</b> DE <b>T</b> EV <b>V</b> E <b>T</b> VA <b>E</b>                          |
| DEDE <b>EE</b> EGEEVVEDR                                                         | AP <b>V</b> ED <b>G</b> S <b>Q</b> PP <b>P</b> PE <b>K</b> G                                  | EV <b>T</b> EV <b>S</b> VG <b>A</b> NP <b>V</b> Q <b>V</b> E                        |
| KVDENMVID <b>E</b> TLDVK                                                         | DE <b>P</b> GE <b>Q</b> VEL <b>K</b> EE <b>A</b> E <b>A</b> P <b>V</b>                        | E <b>I</b> D <b>K</b> EG <b>V</b> IE <b>P</b> DT <b>D</b> AP <b>Q</b>               |
| VGEQD <b>G</b> GLIGAEKVIN                                                        | VEL <b>K</b> EE <b>A</b> E <b>A</b> P <b>V</b> ED <b>G</b> S <b>Q</b> PP <b>P</b>             | EL <b>M</b> ED <b>S</b> R <b>T</b> E <b>A</b> ED <b>R</b> GG <b>Q</b>               |
| DLQ <b>P</b> WHSFGADSV <b>P</b> AN                                               | L <b>V</b> ED <b>S</b> A <b>EE</b> EST <b>L</b> T <b>K</b>                                    | V <b>L</b> EED <b>S</b> AD <b>W</b> E <b>K</b> EL <b>Q</b> Q                        |
| DG <b>S</b> EDK <b>V</b> VEVA <b>EE</b> EEVA                                     | T <b>G</b> SE <b>P</b> GD <b>T</b> E <b>P</b> LE <b>L</b> GG <b>P</b> G                       | F <b>P</b> GD <b>M</b> DE <b>G</b> D <b>A</b> S <b>L</b> F <b>T</b> R <b>P</b> E    |

|                        |                    |                       |
|------------------------|--------------------|-----------------------|
| GSEDKVVEVAEEEE         | EEHVDADQEVILWDHK   | VQSESLIEVLRFDG        |
| MPSLTETKTTVELLPVN      | VILNEPSADAPAALYQT  | DPMGQDRAAEANAVL       |
| VPANTENEVEPVDARPA      | RSGGGFSSGSAGI      | DTQGDHVMVLSVIPG       |
| GPTGEPQEQDEDFLMATD     | AIMDYNRDIIEIMKDIR  | AVYLGEELLHDPM         |
| NPVEDSQVIVEVSI         | SPEEMDLSQEQPLDAQQ  | AAGEALVGAAGFPFH       |
| PVEDSQVIVEVSI          | APGDPEAALEDNLARI   | TAFDEAIAELDTLN        |
| EPHTEPEEQVPVEAEPQN     | DGYIDYAEFAKSLQ     | NLFASFIAPTILGLP       |
| VYEEQAVYEPLENEG        | TVHDQEHIMEHLE      | DEEVDEMIREADIDG       |
| VSNDKALMVLTEEPL        | VHKEEGSEQAPLMSD    | IDELLIWHGMATAQTL      |
| <b>HLA-DQ8trans</b>    |                    |                       |
| DPQFALTNIAVLKHN        | YANLRPFEEAVGELNPS  | EELKEYENIALQENEL      |
| DHVASYGVNLYQSYG        | DVLQSPLDASAARDEL   | EESSEYMAAADEYNR       |
| EDIVADHVASYGV          | FSQLAVSLEEGTGG     | ETPGPRPAGPAGDEP       |
| EDIVADHVASYGVNLYQSYGPS | GRGAVRGAGVAGPA     | ANEVEAVKVHSEFT        |
| FKISYLTLLPSAEESY       | DIVQGAEDQGIQG      | FPTLKFPPASADRTV       |
| SYGSPSQYTHEFDG         | RAAVEDINPADDNN     | AQLRGALQQGEAFQ        |
| TNLEFSQLQPSSELPL       | EHLVMAGNPQQEDNVD   | VPSLQNMGLLLDK         |
| QPEPGEAAAGGAAEARR      | AALSVSQENPEMEGPE   | IPGERVATVLATDADSG     |
| EMATAASSSSLEK          | TPQVQAALSVSQEN     | LGRILAGSADSEGVA       |
| AYFIQPLPAASERLA        | DQRQLQALSEPQPR     | AVQVLGGPAEADRVA       |
| AGYIEALANAGTG          | KEETNEIQVVNEEPQ    | SRMLELSAPELEPPK       |
| ISETPVDVRSSEESE        | SETDKQAALAGNDRNID  | DGPVKVVVAENFDE        |
| AMSQSLKTTQEPLA         | HNPTGIDTPEQ        | LSKDPNIVIAKMDATA      |
| ETKTTVELLPVNGEFS       | ADDWMAGAVAPPARPPR  | EVKEENGLVLDANFD       |
| MPSLTETKTTVELLP        | AGPTKPAASQLESDTIA  | QAVDYEGSRTQEEIVA      |
| TKTTVELLPVNGEFS        | SPRGEPRAPWVEQEGPE  | APVGGGAFPTIVEREPWDG   |
| FGADSVANTENEVEPV       | TQIYKAQAQTDRES     | ANAVLGLDTQGDHM        |
| TSIATTTTTTTES          | SPSVGLSEAYDEDQL    | MVMSVIPGAEADK         |
| MPKYAPKAASARTDL        | LDDEEAGGRPAMEPG    | HPLQVGAAYLGEES        |
| IVEEVSIFPVEEQQEVPP     | DPTADDTSAAVTEEMPPL | DSLHRFVLSQAKDEL       |
| QENPDSSEPVVEDER        | DDPMAYIHFTAEGEVT   | EAPVLAEPPEADK         |
| VTYQVYEEQAVYEPL        | DEEETAKESTAEKDEL   | TTGLEGGVAMPGAED       |
| LDPHTTQPAVEPTD         | EVISWLDANTLAEKDE   | GSESPGDAGAAEGGG       |
| LDDNFASIVTGVEEGR       | GAAVQAAILMGDKS     | AVDTNRASVGDQSP        |
| IAGTDVAKEASD           | IINEPTAAAIAYGLDR   | QYGVTAQAFPHTEEEV      |
| LQLSTYLDPALELGR        | NPDEAVAYGAAVQAAIL  | TAGAAGLSGQHEEVPA      |
| AAAVSGSAAAEAKE         | DAAKNQLTSNPENTV    | SGQEFWPGQSAADILSG     |
| LSLLSGLHGQEEQDQY       | GAAVQAGVLSGDQDTG   | GPGWVSMANAGKDTNG      |
| APKAAEAAAAPAESAAPA     | IINEPTAAAIAYGLDK   | IEVEKPFIAIAKE         |
| LNHKLQDASAEVER         | ITPSYVAFTPEGER     | APPPLSPPQPASPAEEDKMP  |
| IEYAMAYSKAAFERESD      | IAQVATISANGDKE     | EEQLAAAKAQEQEL        |
| LRPAEAVSEPTT           | AEAGPEGVAPAPEGEK   | EQPPVPSPTTEEEEEE      |
| AAAESGTSAADERGP        | EPISEPEKVTGSEPGD   | LDDDMDGTVSVTELQTH     |
| DLLLGLALPYPEKENR       | EPELGGPGAEPPEQKE   | LPAPSAPDLTEPKEEQPV    |
| GAPAAPSPPALELAR        | IPPAGQTEAEPISEPEK  | MPPYDEQTQAFIDAAQEARNK |
| SPPALELARGSVAPAPG      | LTKLGNITISLFGGG    | GEQPKPASPAEEDKMP      |
| VEAAPETTAVSAETGPE      | AGGAAAAAAPEPPPR    | LALARSLPPAEELPV       |
| SWTTRSQLANTEPT         | KPSQVYFGGTVVGEQAM  | VGSEPQAFDVFPENPR      |
| APFRSALESSPDPAT        | GKLQSLDLSAAEMTCG   | VPAKVASKNVIPA         |
| DYVQMKASELKQEET        | AVEIYASVAQLSPLD    | VPAQPADFQAEVESDTR     |
| DARFYALSASFEPFS        | IGTLNAAKVPADTE     | GHSVSYSAVSRNSS        |
| FDYDHDALGAEAEAK        | WNIVSFPVAEELSH     | SITPASATASSEPAPA      |
| ATDFGEALVRHDEF         | AEQVVQGMKEAQERL    | TYGYLGNPAEFHDS        |
| SFETQKTNLATENQY        | NPSYKYFYVSAEQVV    | DYDREALLGVEDVDEY      |
| LPPDVPNAQPALEGR        | AAEEANAVLGLDTQ     | EDPEWILVEKDRFVN       |
| DDFDLGDVAVDGENDDPR     | LARADAAKALAEAAA    | VEVGGGAAGERELD        |
| PNPNHPSSSGSFSADL       | LENEANNIKMEAEENLE  | VPVSNEISNSASSHEEDN    |
| DNPPEFTAMTFYGEVPE      | ADQDMMMAGMASQAAQE  | SPPSASPAESEPCQDP      |

|                     |                    |                      |
|---------------------|--------------------|----------------------|
| DMEALRSTLQTMESD     | TGNLAEQARAHVENTE   | LPALFGATLSQEGLO      |
| SQAKYGISGKDVSPD     | ADELALVDVLEDK      | QEGLOQFLVEAHPDN      |
| FRINPDGSQSVVEVPY    | GMQHPGSAGGVYETTQ   | ALIKAAAGVNVPEFWP     |
| TIQMGFRINPDGSQ      | AMLSTPVAEG         | GPAPSTAAAPAEKK       |
| WPSDDIEEAGIVAREFG   | AVTPLGPPAAEYW      | AAPAAGSAPAAAEKK      |
| DNFGGNTAWEEEN       | DSDVGVYRAVTPPLGP   | NPFADPVDVNPFDPSVT    |
| GGRAQLAMALFEQEQ     | FSDVGVYRAVTPPLGP   | TAASTSTLPAGEGPK      |
| VPAREAGSAVEAEELV    | RAVTPPLGPPAAEY     | AMEGFIKPSVEPS        |
| VGGPMDASVEEGVR      | ADLLSTQPGREEGSP    | ALNEAKQMIAVADEN      |
| SVSPWMSVLSEKLS      | LNLPTGIPIVYELDK    | IDSNHDGIVTAAEELS     |
| VPPDPAQSGSTPAEALPG  | TIEDMNGAFSGLDK     | LPPDHLNGVKLEMDGHL    |
| VQLEVVASPARLLL      | SPALPRTTGPSEDAGGD  | GSKLVDYARSVHEEF      |
| AQEKFQDLGAAVEVLS    | DARQVTSNLSLGTQE    | YSEFFTGSKLVDYA       |
| QQMILQIGVVNEAPF     | SKHAIYAVQVIADPPGPG | AGRVVAGQIFLDSEE      |
| TGVITTTSSQLDREL     | SPPRPGGFLPYEYGPD   | VPPEYVWAPAKPPEETS DH |
| LPLPLPIRVEDEN       | VISWRGAVIEPEQGT    | QEESLSARPALETEG      |
| ESAAMAASANIENSG     | IISNIRDSVINLSES    | KPVVAPTL SVVQTEGSR   |
| EPPAPAQQLQPQVAVQGPE | IKDSVLELTANAEGPPA  | TLRDAMMSQAREML       |
| MDATSYSSIASSEFGVR   | DFPSLTRNLPSQELPQ   | PPAYHETLAGGAAAPYP    |
| ISQRIVSAQSLAEDDVE   | APEAGASPVKEEAPA    | AEVLEVFHPTHEWQA      |
| GFLVGGASLKPEFVD     | AKGAEASAASEEE      | ALQPGQAVPAGSHV       |
| AGAQAAAVALNEEFL     | EPQAKGAEASAASEE    | DAEVLEVFHPTHEWQA     |
| APPEDKVVP SFLPVDQG  | EPPAASFVSPGSM      | DRPGQGIAPVPGEAHR     |
| EGMVEENQVNVVTR      | ELSTAITHVKEEGSE    | GQPAPVQPAKEDLGP      |
| RVPAAGAVAAAEVTV     | IMEHLEGVINKPEAEM   | FPQTTEKISPNWESGIN    |
| GGGKVAPAQPSEEGPG    | TPEGEFVSMGVISDGN   | DTDVEEGSEVEDERPA     |
| TPATAPSATSPAQEEM    | DVAATASKQMSEK      | IIEGAFEGASGVNE       |
| LTDHGAASPQLEPEPQ    | LELYNSAATDSEKA     | EVSVGANPVQVEVGE      |
| QEVAETSLQLPQDEVSA   | GGAMEEMQPLHEDN     | SEGPSLDP SQEGPT      |
| PQPPPQQVRSATAGSEGGF | NTEKYMGTESQGSAA    | RPGPTAESASGPSDEPS    |
| DLEQALAAFLSTPGGSH   | APPLEEGLGGAMEEMQP  | RATGSAATAASSPA       |
| VVGRAAEVPGPEPG      | TATLVMAPPLEEGLG    | SAATAASSPAAAAGD      |
| TPDGTEAEADV IEN     | GDTIFSIVTGGEETR    | VDVKPSPSAAEADFD      |
| APGPLAQSVDSNKEE     | QVDPGAAAAA         | TQVMAASMSAFDPLK      |
| SGHGSVAEREAGGE      | APEPAASPAGPEEPG    | IPSIQLFPGLREPEE      |
| VPRELSGSSPVLEETHPA  | GPGDPAAPAEAEQA     | SPPQEEVKSEPTEDVEPK   |
| EAYVGGTMVRSGQDPY    | AAAMAAAAAETSQR     | FYQPMPLKASLEIEYQ     |
| PVLRPGILGNFEPKEPEP  | VYPVYQPVGPKQYPYN   | APEPGVPSPSSQEP       |
| FNMVASDMI SLDRSVN   | GLNLGAVVSDVETG     | ALALKQSSVAEEVGLL     |
| SIKEFGFNMVASMIS     | LDVMKEAMVQAEAAA    | GPATHGSAVFGYEG       |
| DPAEGDGAQPEETPR     | AASVAAGGAELRS      | LPSRDSSTAVAPEN       |
| SYDNYEGSAPNLFVWN    | AEQLRQTALQEAR      | ADAEDLSGSIASPDVK     |
| STFDAGAGIALNDH      | DVPVPAPAGDQKEVDT   | LVNQAALKA AVDGKE     |
| VDIVAINDPFID        | GWETVEMHPAYTEEL    | DMLIKAATSDLEHYD      |
